# Supplementary material
Source: publisher site journal article supplement (https://www.dovepress.com/article/451538)
Supplement: Supplementary file 1 [file get_supplementary_file.php]

**Supplement table 1.** Baseline characteristics of 84 MMD patients and 70 healthy individuals.

| **Variables** | **MMD patients (n=84)** | **Healthy individuals (n=70)** |
| --- | --- | --- |
| Demographics | | |
| Age, median (IQR) | 35.0 (24.5-47.0) | 35.5 (29.0-40.5) |
| Sex, n (%) | | |
| Male | 38 (45.2%) | 34 (48.6%) |
| Female | 46 (54.8%) | 36 (51.4%) |
| Cigarette smoking, n (%) | 11 (13.1%) | / |
| Alcohol drinking, n (%) | 6 (7.1%) | / |
| Comorbidities and family history, n (%) | | |
| Hypertension | 33 (39.3%) | / |
| Diabetes | 8 (9.5%) | / |
| Hyperlipidemia | 13 (15.5%) | / |
| Hyperhomocysteinemia | 5 (6.0%) | / |
| Family history of Stroke | 7 (8.3%) | / |
| Clinical features | | |
| Primary symptom, n (%) | | |
| Ischemia | 61 (72.6%) | / |
| Non-Ischemia | 23 (27.4%) | / |
| Systolic blood pressure, SBP(mmHg), median (IQR) | 122.0 (114.0-131.5) | / |
| Diastolic blood pressure, DBP(mmHg), median (IQR) | 80.0 (71.0-85.0) | / |
| modified Rankin’s Scale, mRS, n (%) | | |
| 0 | 6 (7.1%) | / |
| 1 | 61 (72.6%) | / |
| 2 | 13 (15.5%) | / |
| 3 | 4 (4.8%) | / |
| Average Suzuki stage, n (%) | | |
| Early stage (≤3) | 46 (54.8%) | / |
| Late stage (＞3) | 38 (45.2%) | / |
| Posterior circulation involvement, n (%) | 32 (42.9%) | / |

IQR indicates interquartile range.

**Supplement Table 2**. Immunological molecules expression in different subgroups.

| **Subgroup** | | **IgA** | **P** | **IgG** | **P** | **IgM** | **P** | **IgE** | **P** | **C3** | **P** | **C4** | **P** |
| --- | --- | --- | --- | --- | --- | --- | --- | --- | --- | --- | --- | --- | --- |
| **Age** | |  | ＜0.001 |  | 0.005 |  | 0.010 |  | 0.192 |  | 0.747 |  | 0.083 |
|  | ＜40 | 1.50±0.69 |  | 10.55±2.61 |  | 1.16 (0.88-1.47) |  | 44.14 (13.38-135.45) |  | 98.48±12.30 |  | 23.22±6.43 |  |
|  | ≥40 | 2.34±0.79 |  | 12.15±2.31 |  | 0.89 (0.66-1.17) |  | 29.00 (6.26-68.79) |  | 99.92±20.83 |  | 20.79±6.18 |  |
| **Sex** | |  | 0.061 |  | 0.574 |  | 0.001 |  | 0.647 |  | 0.653 |  | 0.555 |
|  | Male | 1.68±0.66 |  | 11.06±2.34 |  | 1.17 (0.94-1.52) |  | 32.27 (9.36-100.13) |  | 98.21±17.86 |  | 22.28±5.48 |  |
|  | Female | 2.01±0.94 |  | 11.38±2.81 |  | 0.88 (0.67-1.14) |  | 44.64 (11.77-108.53) |  | 100.21±21.90 |  | 21.45±7.05 |  |
| **Symptom** | |  | 0.036 |  | 0.872 |  | ＜0.001 |  | 0.302 |  | 0.725 |  | 0.047 |
|  | Ischemia | 1.74±0.85 |  | 11.21±2.73 |  | 1.15 (0.93-1.52) |  | 45.08 (10.67-116.05) |  | 99.78±21.46 |  | 20.99±6.37 |  |
|  | Non-ischemia | 2.17±0.75 |  | 11.31±2.28 |  | 0.79 (0.63-0.8) |  | 24.2 (6.90-69.00) |  | 98.04±16.21 |  | 24.07±5.91 |  |
| **Hypertension** | |  | 0.808 |  | 0.926 |  | 0.069 |  | 0.858 |  | 0.678 |  | 0.356 |
|  | Yes | 1.91±0.85 |  | 11.17±2.65 |  | 0.94 (0.69-1.22) |  | 40.05 (12.05-110.30) |  | 97.17±14.27 |  | 23.34±3.98 |  |
|  | No | 1.85±0.84 |  | 11.25±2.61 |  | 1.14 (0.85-1.52) |  | 35.39 (6.01-1101.90) |  | 99.70±21.03 |  | 21.55±6.70 |  |
| **Diabetes** | |  | 0.164 |  | 0.876 |  | 0.648 |  | 0.311 |  | 0.066 |  | 0.091 |
|  | Yes | 2.25±1.04 |  | 11.09±2.30 |  | 1.02 (0.55-2.17) |  | 63.95 (28.92-123.45) |  | 111.70±12.63 |  | 25.45±5.72 |  |
|  | No | 1.82±0.81 |  | 11.25±2.64 |  | 1.03 (0.78-1.39) |  | 34.39 (9.47-99.70) |  | 98.00±20.33 |  | 21.45±6.35 |  |
| **Hyperlipidemia** | |  | 0.808 |  | 0.926 |  | 0.367 |  | 0.643 |  | 0.678 |  | 0.356 |
|  | Yes | 1.91±0.85 |  | 11.17±2.65 |  | 0.94 (0.74-1.16) |  | 52.31 (16.61-115.00) |  | 97.17±14.27 |  | 23.34±3.98 |  |
|  | No | 1.85±0.84 |  | 11.25±2.61 |  | 1.06 (0.74-1.40) |  | 33.39 (6.90-101.90) |  | 99.70±21.03 |  | 21.55±6.70 |  |
| **Hyperhomocysteinemia** | |  | 0.925 |  | 0.487 |  | 0.898 |  | 0.741 |  | 0.653 |  | 0.771 |
|  | Yes | 1.83±0.88 |  | 10.45±2.66 |  | 0.99 (0.91-1.55) |  | 45.88 (5.31-495.6) |  | 95.36±22.67 |  | 21.02±4.80 |  |
|  | No | 1.86±0.84 |  | 11.28±2.60 |  | 1.05 (0.74-1.39) |  | 35.39 (10.21-100.50) |  | 99.57±20.04 |  | 21.88±6.47 |  |
| **mRS** | |  | 0.339 |  | 0.214 |  | 0.942 |  | 0.628 |  | 0.496 |  | 0.839 |
|  | ≤2 | 1.92±0.86 |  | 11.37±2.59 |  | 1.05 (0.74-1.40) |  | 35.39 (6.90-101.90) |  | 98.55±21.27 |  | 21.90±6.40 |  |
|  | ＞2 | 1.63±0.73 |  | 10.69±2.63 |  | 0.98 (0.88-1.17) |  | 40.05 (16.80-112.00) |  | 102.29±14.62 |  | 21.55±6.43 |  |
| **PC involvement** | |  | 0.621 |  | 0.501 |  | 0.183 |  | 0.911 |  | 0.567 |  | 0.112 |
|  | Yes | 1.82±0.73 |  | 11.41±2.69 |  | 0.94 (0.69-1.35) |  | 43.19 (11.89-97.04) |  | 100.48±16.73 |  | 22.86±6.35 |  |
|  | No | 1.91±0.96 |  | 11.03±2.51 |  | 1.14 (0.87-1.40) |  | 35.39 (6.08-141.90) |  | 97.95±23.52 |  | 20.64±6.25 |  |

mRS, indicates modified Rankin’s scale and PC indicates posterior circulation.

**Supplement table 3.** Immunological molecules expression difference in 72 patients between baseline and follow-up.

| **Immunological molecules** | **Baseline expression, median (IQR)** | **Follow-up expression, median (IQR)** | **P** |
| --- | --- | --- | --- |
| **Progressive group (n=25)** | | | |
| IgA (g/L) | 1.53±0.79 | 1.44±0.71 | 0.134 |
| IgG (g/L) | 10.41±2.29 | 9.94±2.71 | 0.219 |
| IgM (g/L) | 1.16 (0.82-1.45) | 1.19 (0.81-1.76) | 0.882 |
| IgE (IU/L) | 97.30 (13.20-182.75) | 39.27 (12.52-141.22) | 0.002** |
| C3 (mg/dL) | 108.55±22.05 | 97.46±17.96 | 0.012* |
| C4 (mg/dL) | 22.31±7.57 | 17.50±4.88 | ＜0.001*** |
| **Stable group (n=47)** | | | |
| IgA (g/L) | 1.98±0.87 | 1.94±0.71 | 0.470 |
| IgG (g/L) | 11.71±2.70 | 11.35±2.45 | 0.180 |
| IgM (g/L) | 0.98 (0.74-1.30) | 1.09 (0.88-1.43) | ＜0.001*** |
| IgE (IU/L) | 33.19 (6.78-80.44) | 26.96 (8.40-46.70) | 0.166 |
| C3 (mg/dL) | 96.84±17.75 | 108.43±24.05 | 0.001** |
| C4 (mg/dL) | 21.50±6.22 | 20.89±5.54 | 0.218 |

IQR indicates interquartile range; *P＜0.05； **P＜0.01； ***P＜0.001.

| **Variables** | **β-coeficient** | **OR (95%CI)** | **P** |
| --- | --- | --- | --- |
| IgA | 0.112 | 1.118 (0.751-1.665) | 0.582 |
| IgG | 0.033 | 1.034 (0.908-1.177) | 0.614 |
| IgM | 0.579 | 1.785 (0.947-3.364) | 0.073 |
| IgE | 0.001 | 1.001 (0.999-1.003) | 0.200 |
| C3 | 0.003 | 1.003 (0.987-1.019) | 0.725 |
| C4 | -0.049 | 0.952 (0.903-1.004) | 0.071 |

**Supplement Table 4**. Univariate analysis between immunological molecules and revascularization.

OR, indicates odd ratio and CI, confidence interval.

**Supplement Table 5.** Risk factors association with vasculopathy progression in univariate analysis.

| **Variables** | **β-coeficient** | **OR (95%CI)** | **P** |
| --- | --- | --- | --- |
| Age | -0.033 | 0.968 (0.939-0.997) | 0.031* |
| Sex, male | 0.047 | 1.048 (0.417-2.633) | 0.920 |
| Cigarette smoking | -0.217 | 0.805 (0.214-3.026) | 0.748 |
| Alcohol drinking | -0.811 | 0.444 (0.084-2.363) | 0.342 |
| Symptom, ischemia | 1.464 | 4.324 (1.158-16.151) | 0.029* |
| SBP | 0.011 | 1.012 (0.985-1.039) | 0.404 |
| DBP | 0.043 | 1.044 (1.001-1.089) | 0.045* |
| Hypertension | 0.140 | 1.150 (0.448-2.954) | 0.772 |
| Diabetes | -0.835 | 0.434 (0.100-1.887) | 0.266 |
| Hyperlipidemia | -0.713 | 0.490 (0.147-1.633) | 0.245 |
| Hyperhomocysteinemia | -0.365 | 0.694 (0.109-4.421) | 0.699 |
| Family history of stroke | 0.184 | 1.202 (0.218-6.631) | 0.833 |
| Suzuki stage, early stage | 0.496 | 1.641 (0.642-4.193) | 0.300 |
| PCI | -0.340 | 0.712 (0.282-1.799) | 0.473 |
| IgA | -0.596 | 0.551 (0.298-1.020) | 0.058 |
| IgG | -0.144 | 0.866 (0.720-1.042) | 0.128 |
| IgM | 0.442 | 1.555 (0.831-2.912) | 0.167 |
| IgE | 0.001 | 1.001 (0.999-1.004) | 0.266 |
| C3 | 0.036 | 1.037 (1.008-1.066) | 0.012* |
| C4 | 0.019 | 1.019 (0.949-1.095 | 0.599 |
| C3/C4 ratio | 0.197 | 1.218 (0.912-1.627) | 0.182 |

OR, indicates odd ratio; CI, confidence interval; SBP, systolic blood pressure; DBP, diastolic blood pressure and PCI, indicates posterior circulation involvement; *P＜0.05.
